# Supplementary material for: The C-H Bond Activation Triggered by Subsurface Mo Dopant on MgO Catalyst in Oxidative Coupling of Methane
Source: MDPI journal article supplement (doi:10.3390/catal12101083), 2022-09-20
Supplement: s1 [file s1]

Archive with 1 entries (1 files):
- catalysts-1910142-supplementary.pdf
